# Supplementary material
Source: HighWire-hosted journal article supplement (https://bmjopen.bmj.com/content/6/11/e012322)
Supplement: inline-supplementary-material-2 [file inline-supplementary-material-2.pdf]

## **Additional file 2**

### **Data collection tool**

#### **1. Socio-demographic, diagnosis and medication therapy data abstraction form**

Patient initials: \_\_\_\_\_ Card. No.: \_\_\_\_\_ Bed No. \_\_\_\_\_

Patient age: \_\_\_\_\_ Sex: M \_\_\_\_\_ F \_\_\_\_\_

Date of admission: \_\_\_\_\_ Date of discharge: \_\_\_\_\_

Current working Diagnosis: \_\_\_\_\_

Other co-morbidities: \_\_\_\_\_

### **Medication history form**

Allergy history: \_\_\_\_\_

No. of medications on admission \_\_\_\_\_

**Previous/Home medications** (Includes prescriptions, OTC medications, herbal/dietary supplements)

| Ser. No | Previous/Home medications | Dose | Route | Frequency | duration | Treatment continued (Yes/No) |
|---------|---------------------------|------|-------|-----------|----------|------------------------------|
|         |                           |      |       |           |          |                              |
|         |                           |      |       |           |          |                              |
|         |                           |      |       |           |          |                              |
|         |                           |      |       |           |          |                              |
|         |                           |      |       |           |          |                              |

### Current medications

| Ser.<br>No | Drug name | Dose , Route,<br>Frequency, duration | Date<br>started | Date<br>stopped | Remarks |
|------------|-----------|--------------------------------------|-----------------|-----------------|---------|
|            |           |                                      |                 |                 |         |
|            |           |                                      |                 |                 |         |
|            |           |                                      |                 |                 |         |
|            |           |                                      |                 |                 |         |
|            |           |                                      |                 |                 |         |
|            |           |                                      |                 |                 |         |
|            |           |                                      |                 |                 |         |
|            |           |                                      |                 |                 |         |
|            |           |                                      |                 |                 |         |
|            |           |                                      |                 |                 |         |

N.B. For PRN medication, please include the dose, time and date given

**If there is any patient concerns in the medication use process (eg. Significant drug-drug interactions, any medication related problems), specify**

---



---

## **2. Medication discrepancies collection form**

### **I. Patient information:**

Age : \_\_\_\_\_

Sex: Male \_\_\_\_\_ Female \_\_\_\_\_

Diagnosis: \_\_\_\_\_

### **II. Occurrence of medication discrepancies**

#### **A) What type (s) of discrepancy (ies) is it?**

##### **1) Intentional medication discrepancies**

a) Yes

b) No

##### **2) Unintentional medication discrepancies**

a) Yes

b) No

#### **B) If it is unintentional medication discrepancy, please describe the error, including description and consequences if any**

### **III. What type (s) of medication error (s) is occurred in this patient? (tick all that apply)**

a) Omitted drug

b) Discrepant in frequency

c) Discrepant in dose

d) Discrepant in route

e) Commission error

f) Different drug from the same therapeutic class without clinical explanation

g) Others, specify \_\_\_\_\_

### **Clinical severity assessment**

Categorizing the clinical severity of unintentional medication discrepancies (Adapted from Cornish et al 2005 [76])

- a) Class 1=Unlikely to cause patient discomfort/clinical deterioration
- b) Class 2= moderate discomfort/clinical deterioration
- c) Class 3= severe discomfort/clinical deterioration
